# Supplementary material for: Synthesis, characterization and in vitro biological evaluation of two matrine derivatives
Source: PubMed Central journal article supplement (PMC6200782; doi:10.1038/s41598-018-33908-8), 2018-10-24

# Synthesis, characterization and in vitro biological evaluation of two matrine derivatives

**Xingan Cheng<sup>1</sup>, Jingmin, Ye<sup>1</sup>, Huiqing He<sup>1</sup>, Zhanmei Liu<sup>1</sup>, Chunbao (Charles) Xu<sup>3</sup>, Bo Wu<sup>1</sup>,  
Xialing, Xiong, Xugang Shu<sup>1</sup>, Xuhong Jiang<sup>1\*</sup>, Xiangjing Qin<sup>2\*</sup>**

<sup>1</sup>Institute of Natural Product Chemistry, Zhongkai University of Agriculture and Engineering, Guangzhou,  
Guangdong 510225, China

<sup>2</sup>Guangdong Key Laboratory of Marine Materia Medica, South China Sea Institute of Oceanology, Chinese  
Academy of Sciences(CAS), Guangzhou 510301, China

<sup>3</sup>Department of Chemical and Biochemical Engineering, Western University, London, Ontario N6A5B9, Canada

\*Corresponding authors. E-mail address:jiangxh69@163.com (X.H.Jiang) ;xj2005qin@126.com(X.J.Qin)

## **Supporting information:**

**Supplementary Figure S1-S3.**

## Supplementary materials

**Figure S1.** LR-ESI-MS analysis of matrine derivative 1(a) and 2(b).

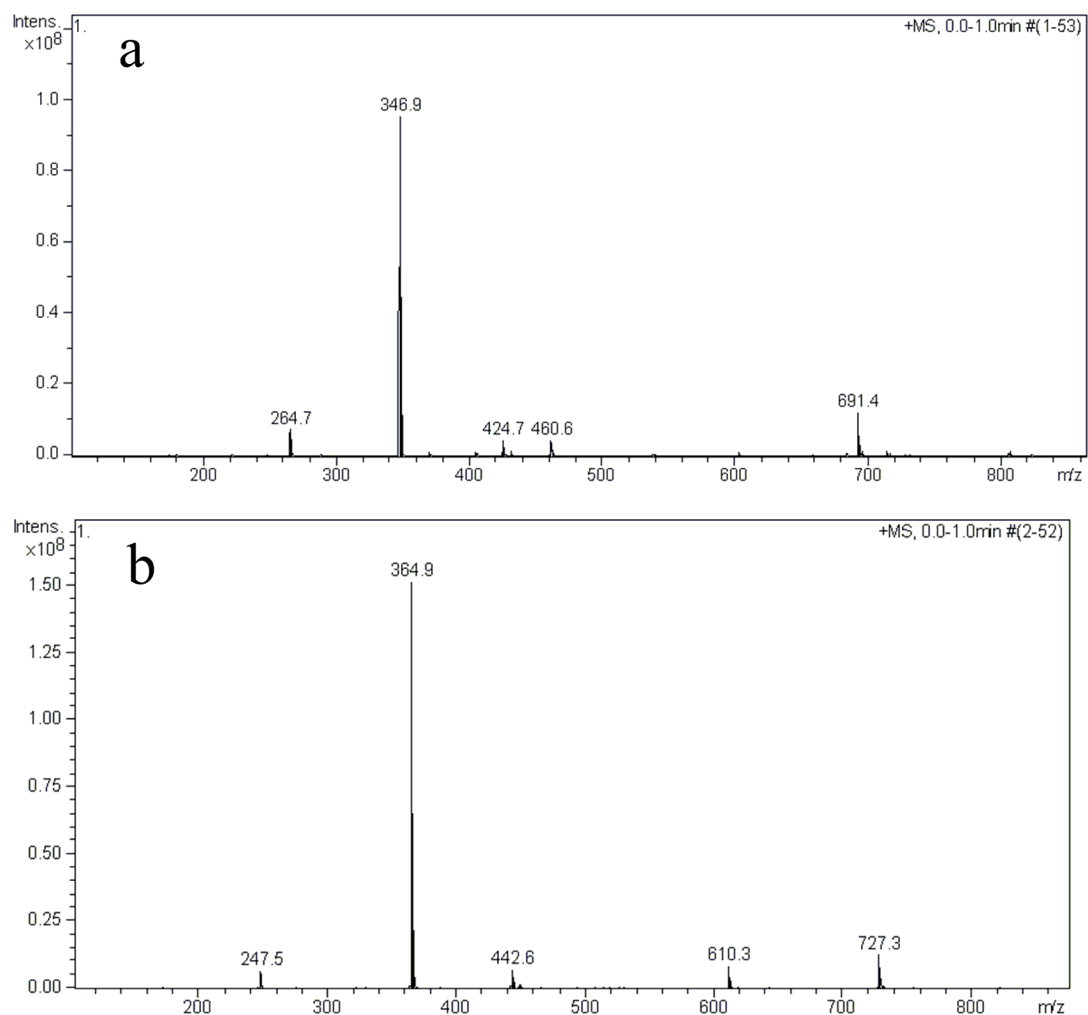

**Figure S2.**  $^1\text{H}$  NMR (A) and  $^{13}\text{C}$  NMR (B) spectra of matrine derivative 1 in  $\text{CDCl}_3$

**A**

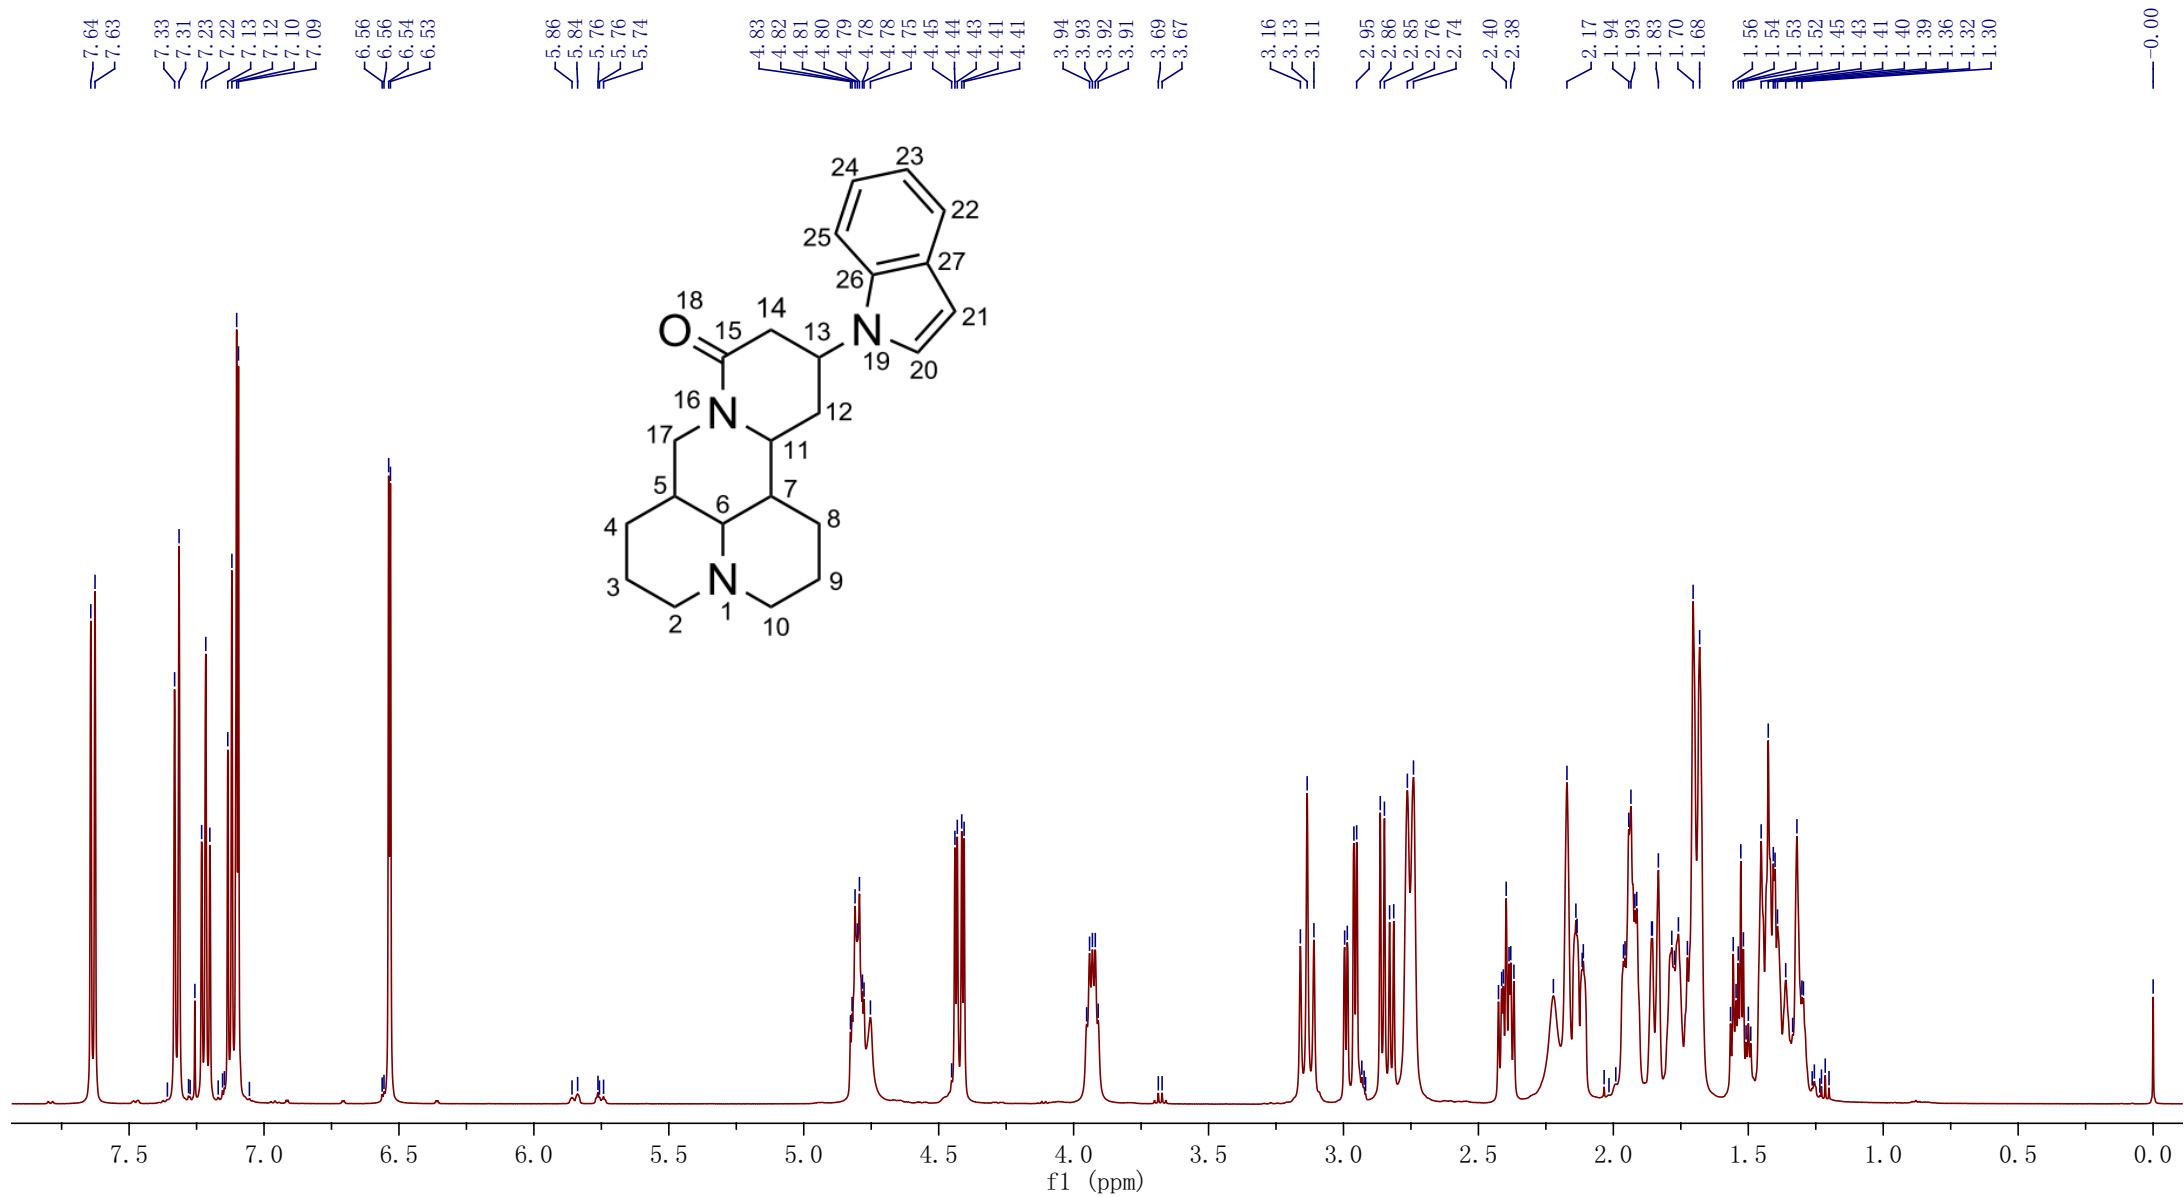

B

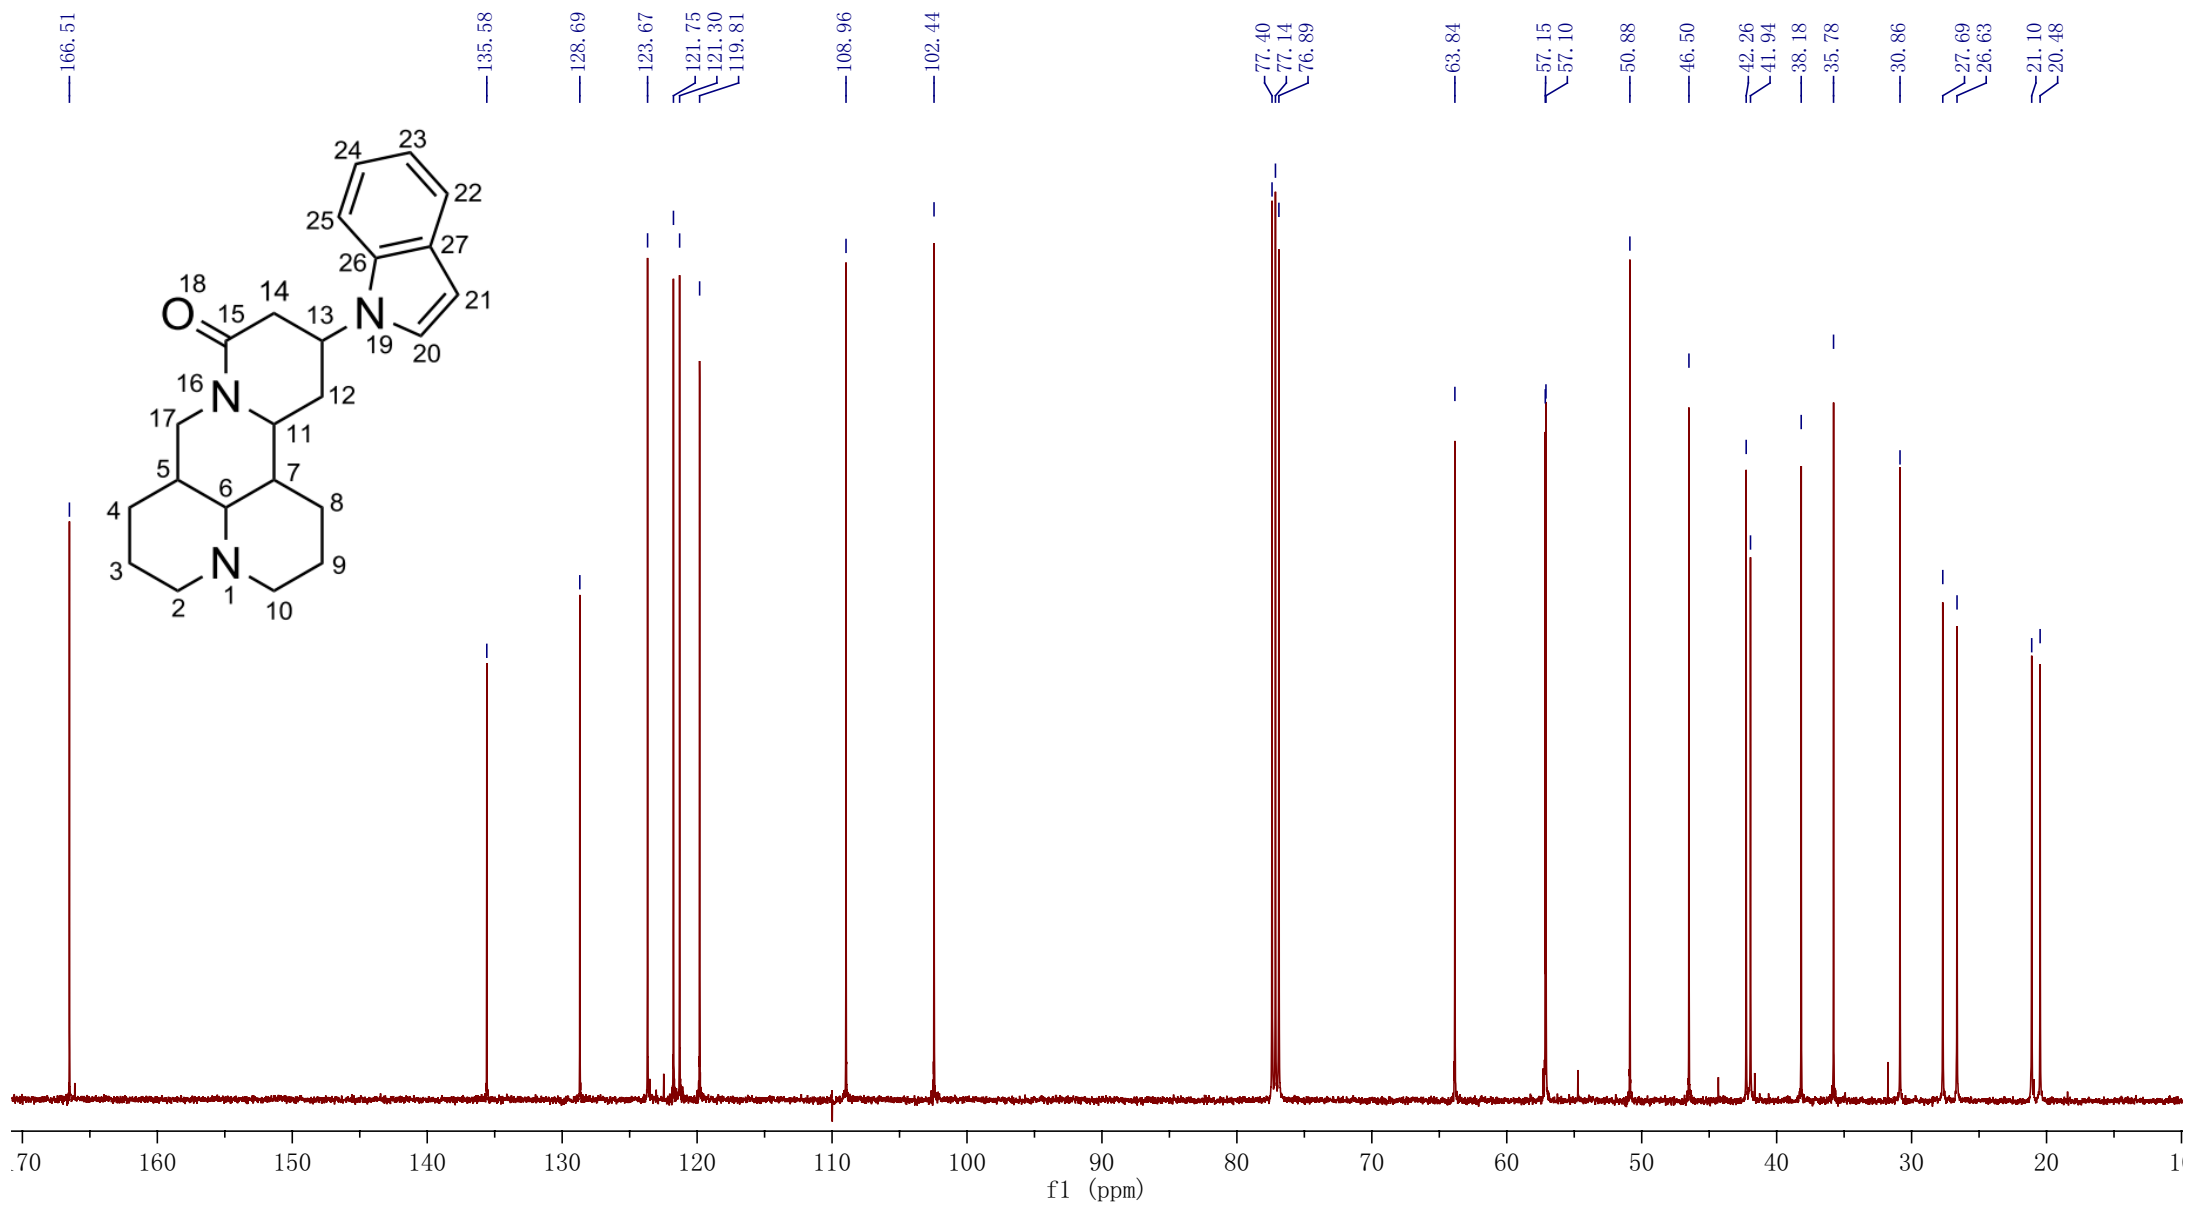

Figure S3. <sup>1</sup>H NMR (A) and <sup>13</sup>C NMR (B) spectrums of matrine derivative 2 in CDCl<sub>3</sub>

A

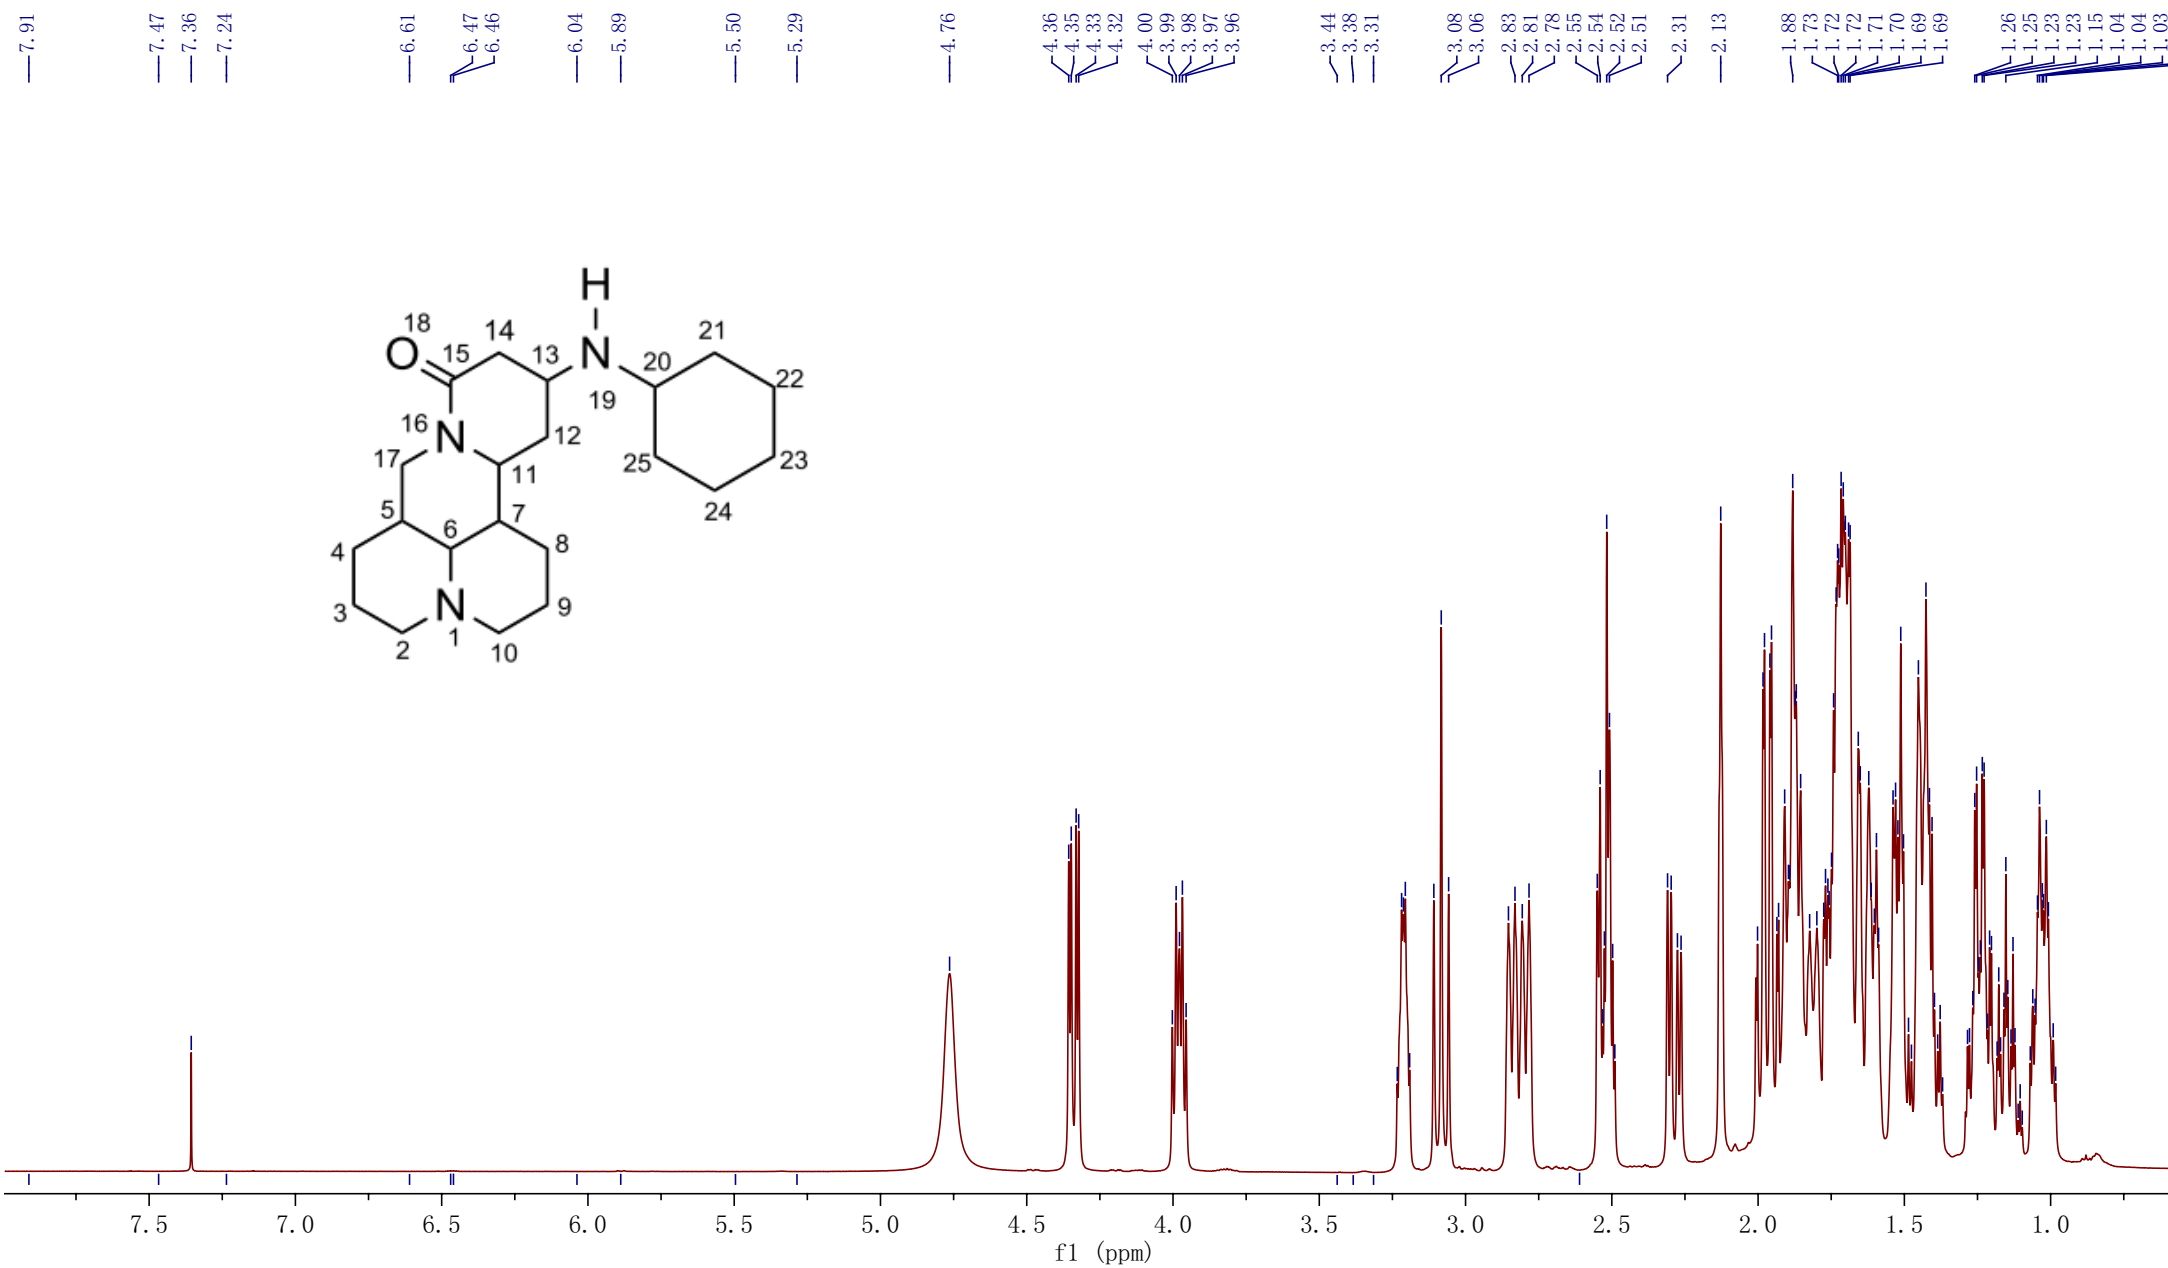

B

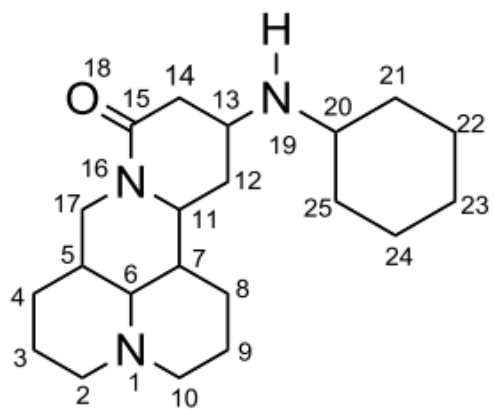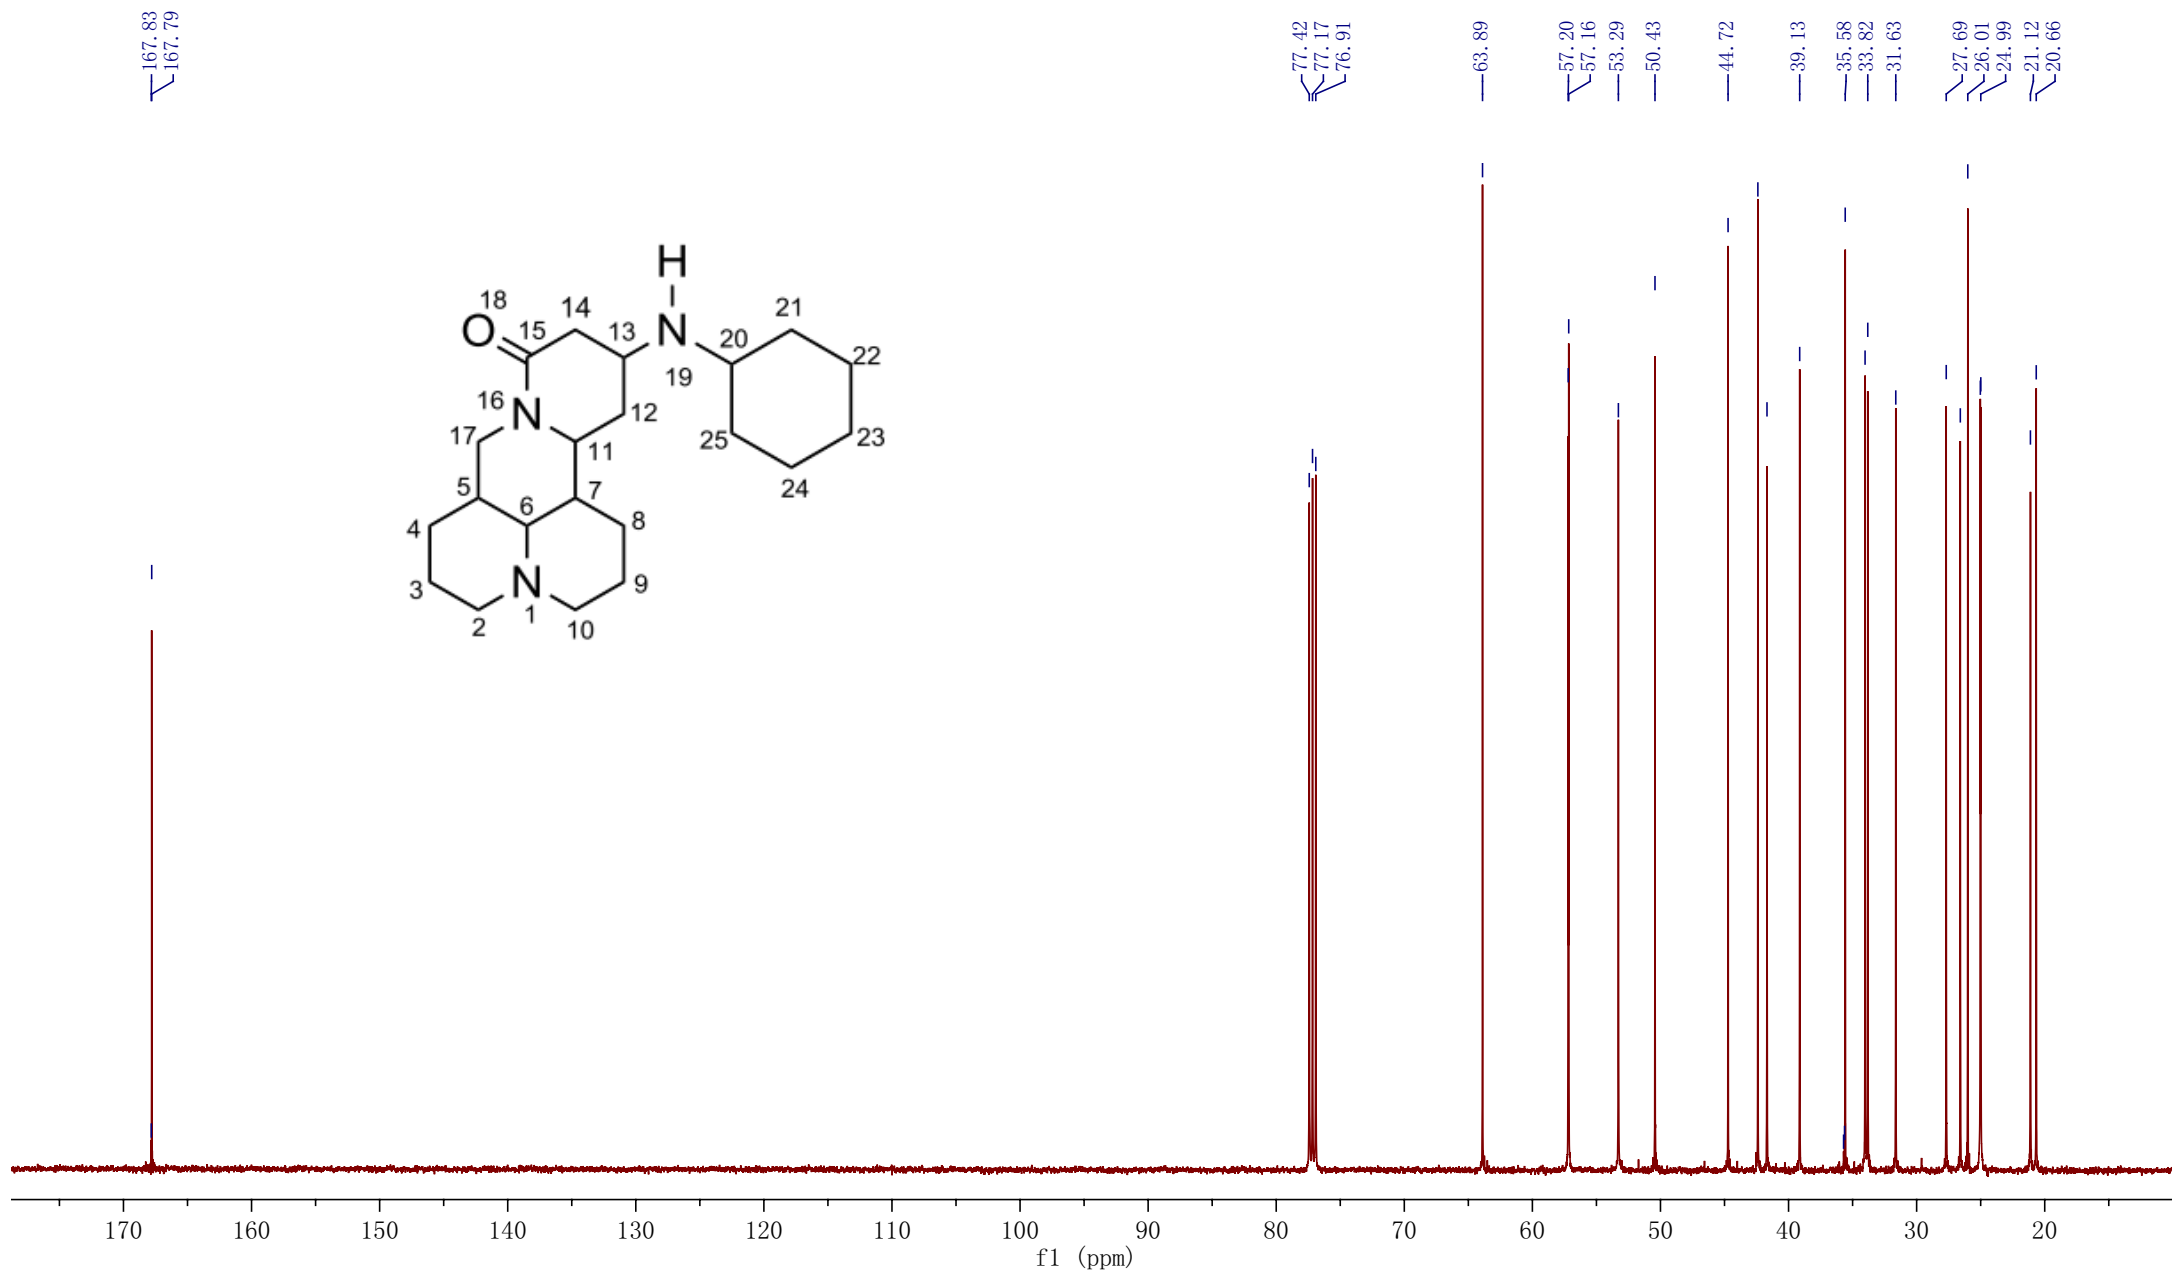

Supplement: 41598_2018_33908_MOESM1_ESM.pdf [file 41598_2018_33908_MOESM1_ESM.pdf]
